# Supplementary material
Source: Springer Nature journal article supplement (https://www.springerprofessional.de/resource/supplementary/13688_2014_30_MOESM7_ESM.pdf/11893784)

Correlation

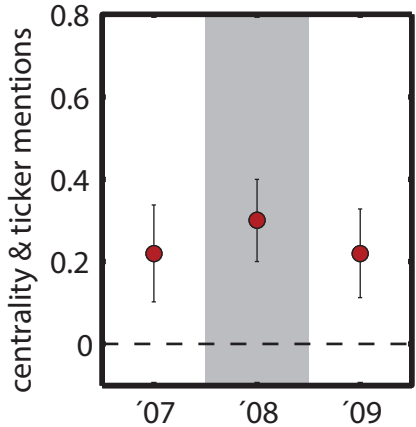

Correlation

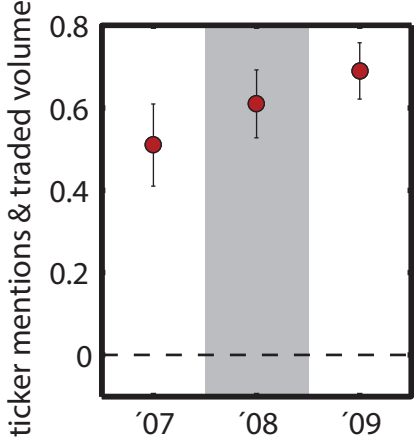

Supplement: MOESM7 [file 11893784]
